# Supplementary material for: Expression of the foraging gene in adult Drosophila melanogaster
Source: PubMed Central journal article supplement (PMC8846931; doi:10.1080/01677063.2021.1941946), 2021-08-12
Supplement: INEG_A_1941946_SM8916.pdf [file INEG_A_1941946_SM8916.pdf]

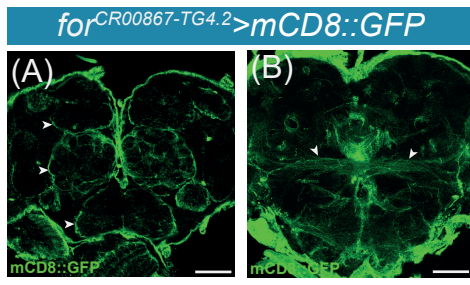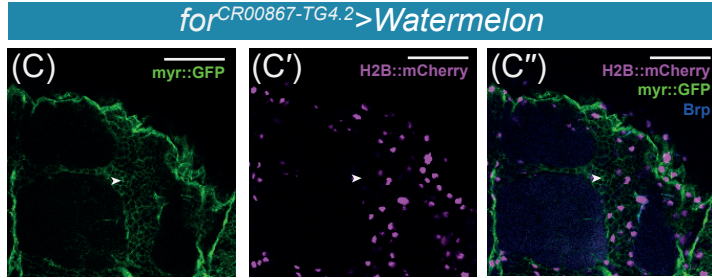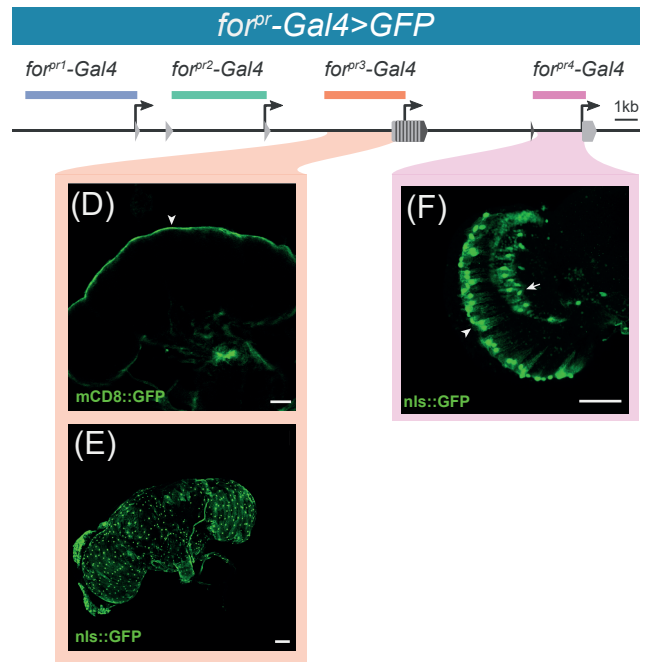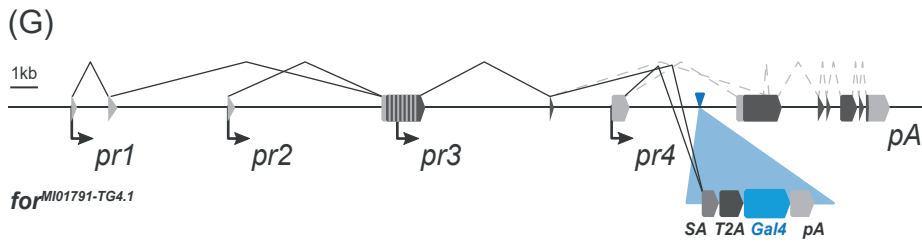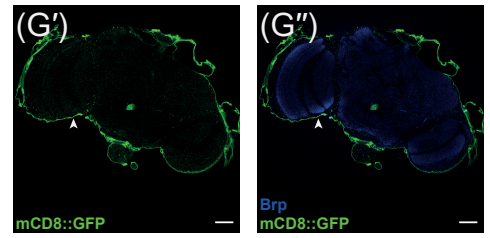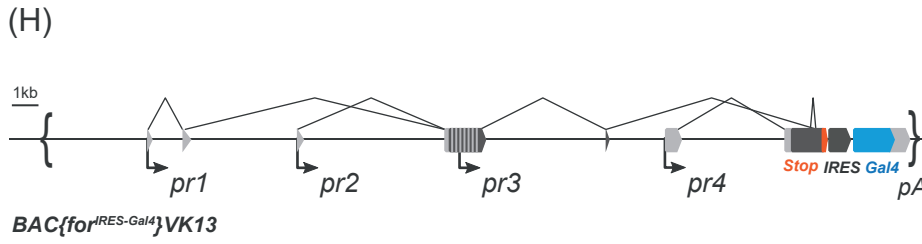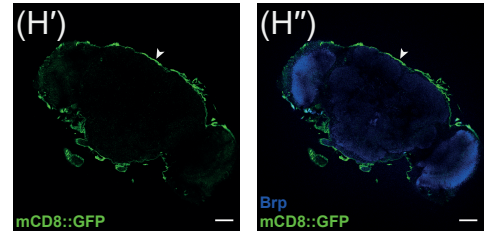

Figure S1
